# Supplementary material
Source: PubMed Central journal article supplement (PMC11105172)

Figure S1

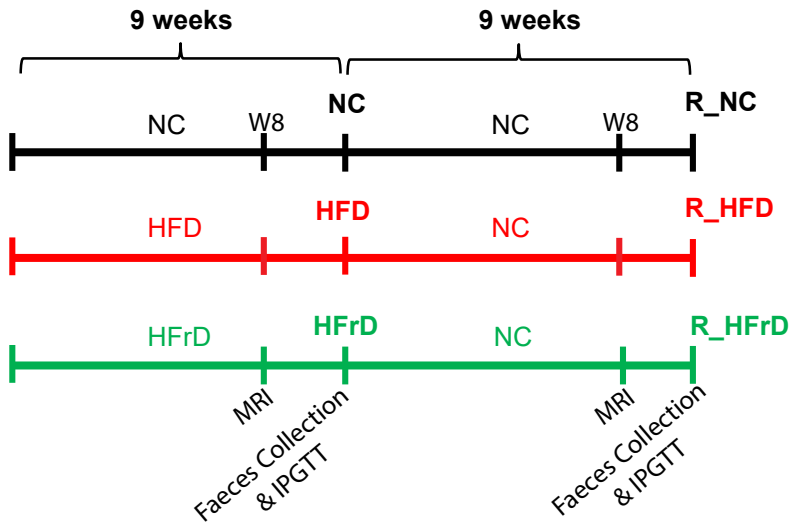

Supplement: 18_2019_3114_MOESM1_ESM.pdf [file 18_2019_3114_MOESM1_ESM.pdf]

Figure S2

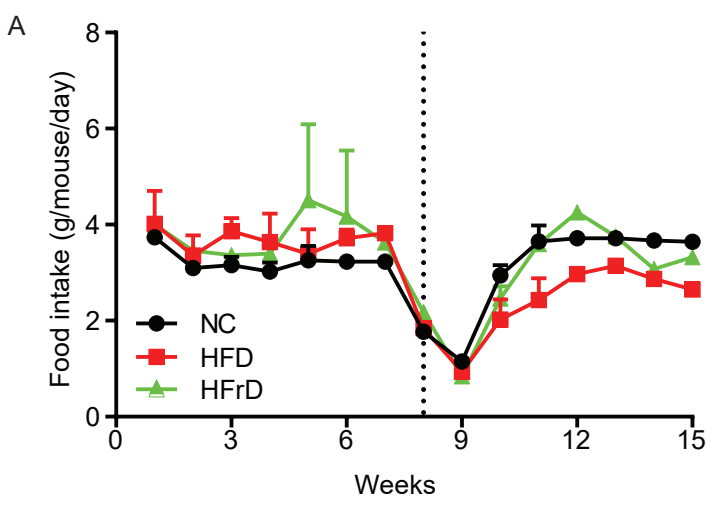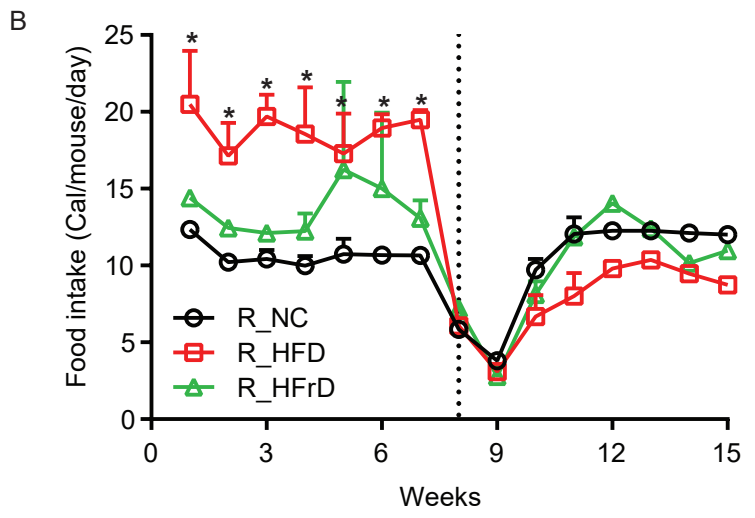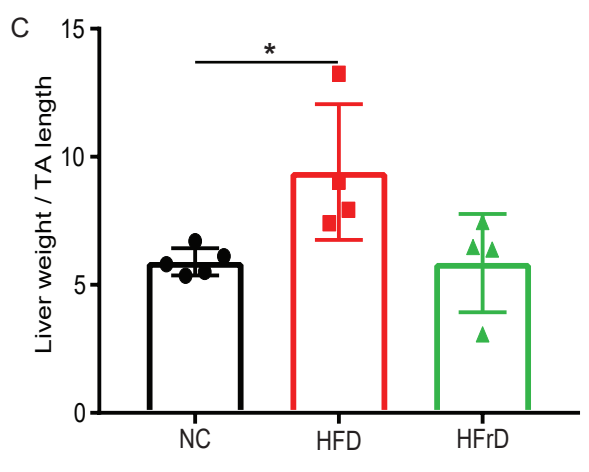

Supplement: 18_2019_3114_MOESM2_ESM.pdf [file 18_2019_3114_MOESM2_ESM.pdf]

Figure S3

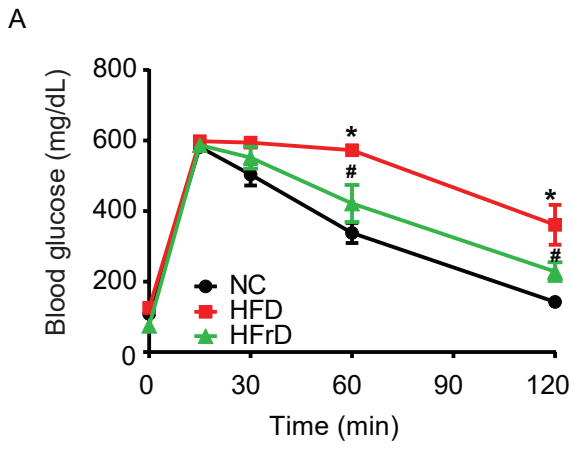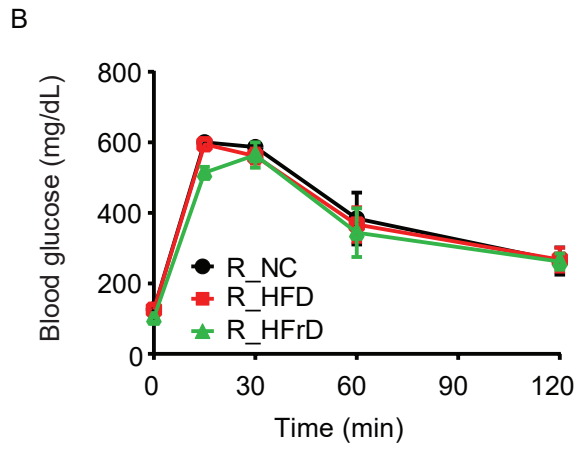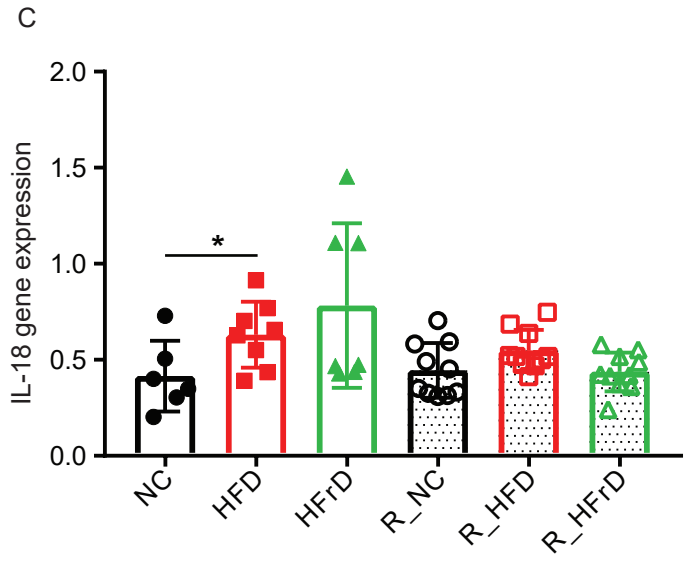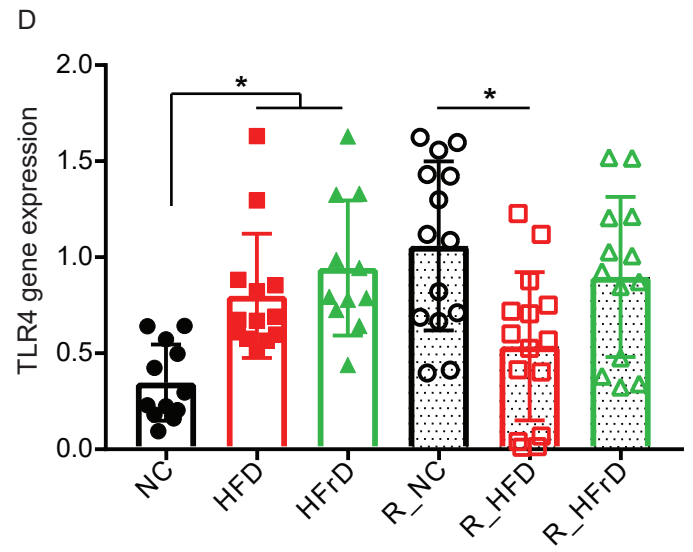

Supplement: 18_2019_3114_MOESM3_ESM.pdf [file 18_2019_3114_MOESM3_ESM.pdf]

Figure S4

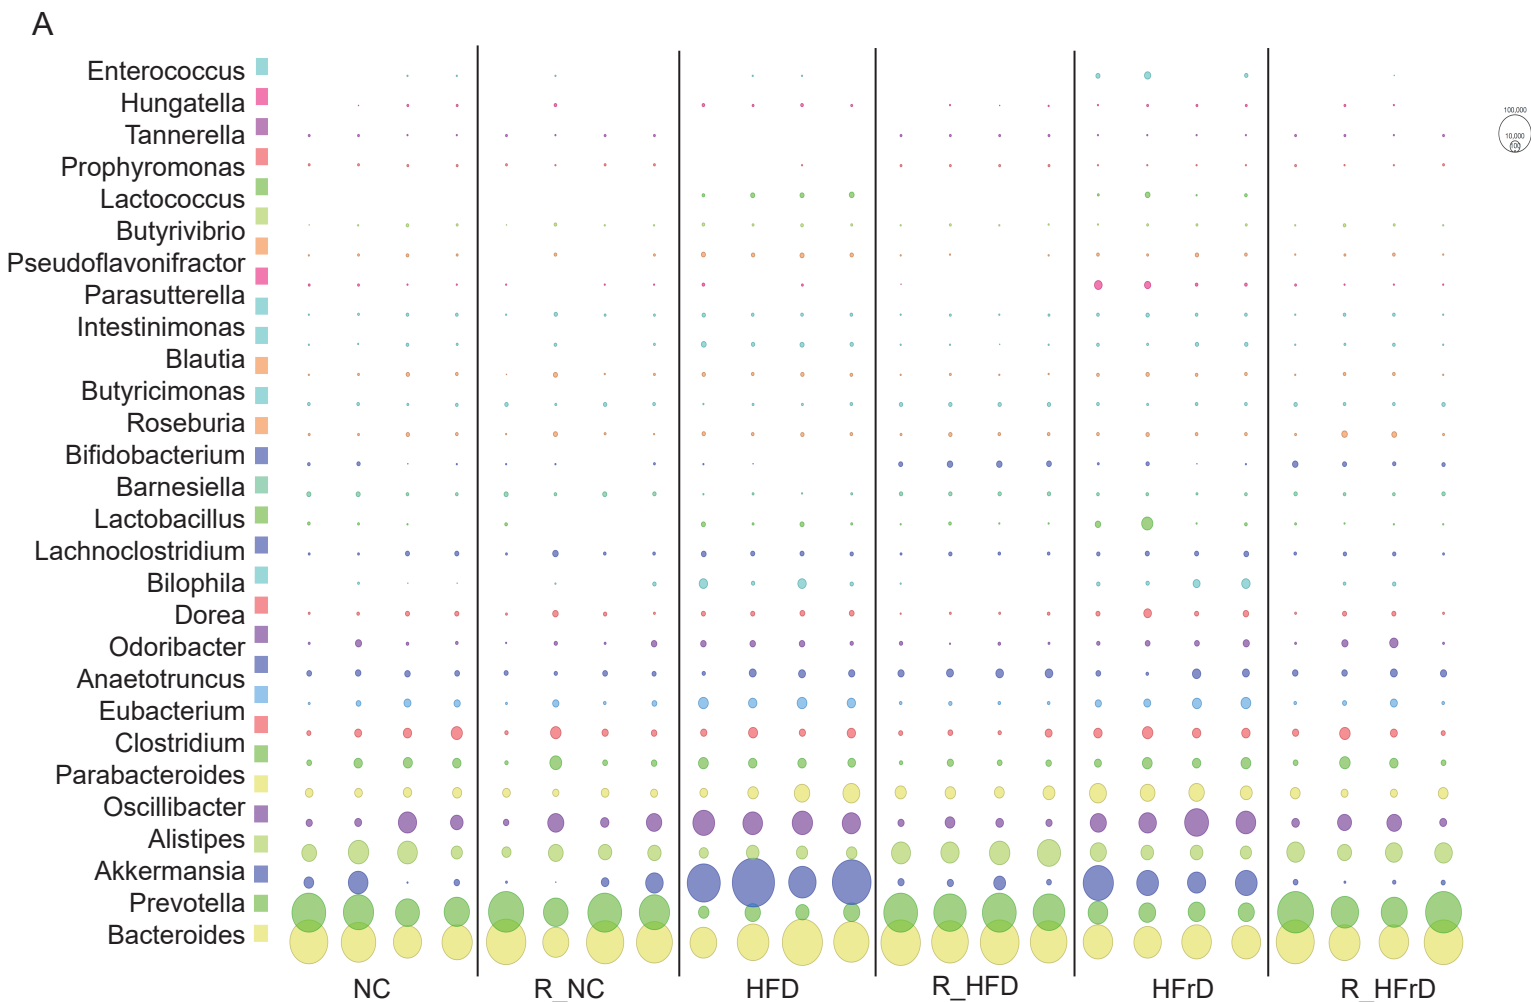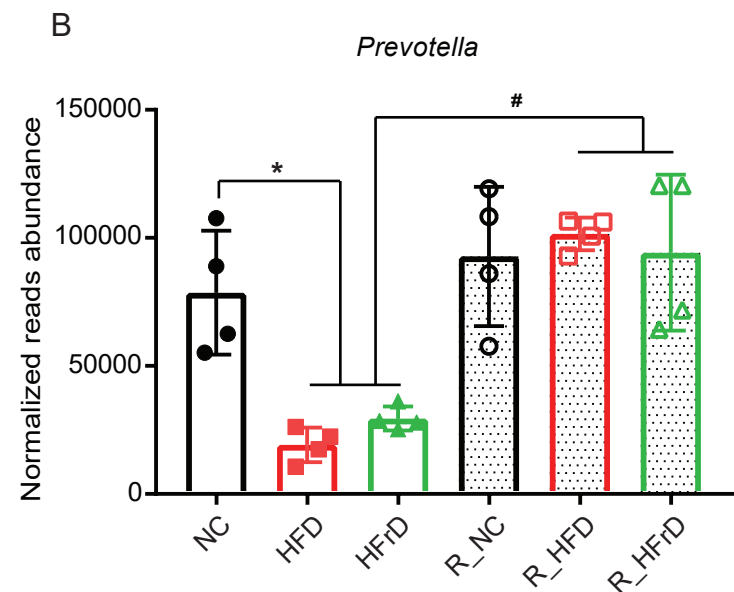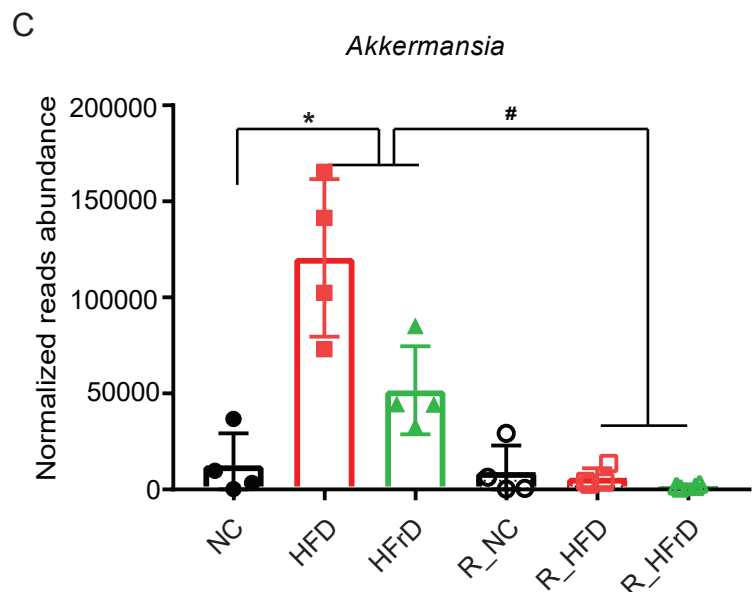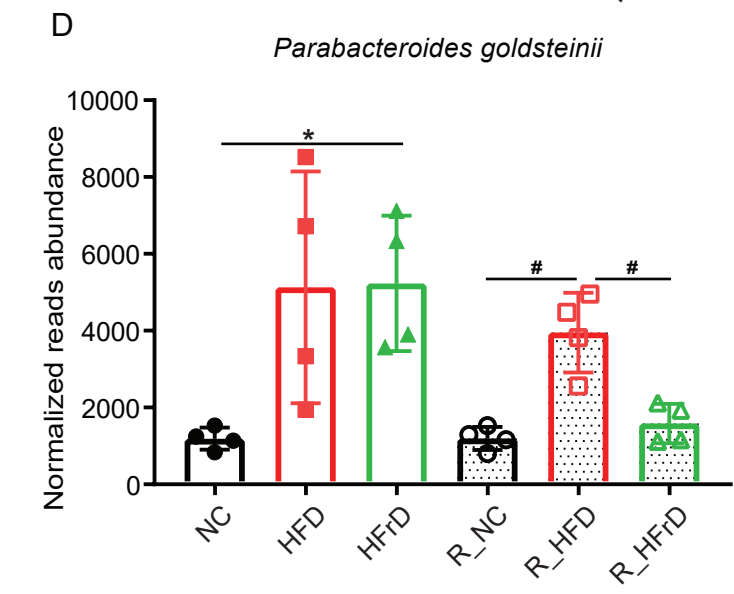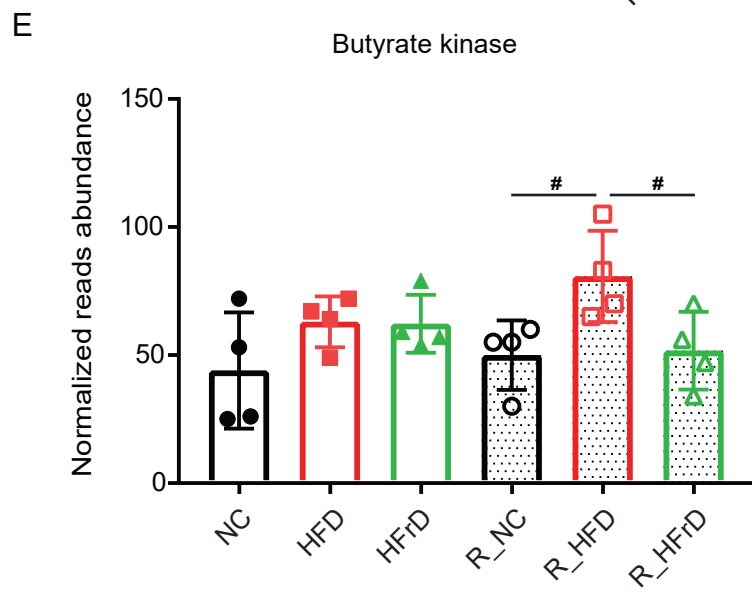

Supplement: 18_2019_3114_MOESM4_ESM.pdf [file 18_2019_3114_MOESM4_ESM.pdf]

A

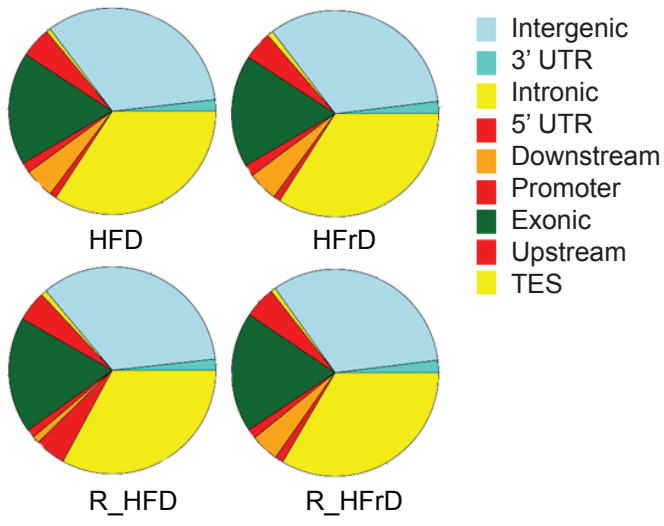

B

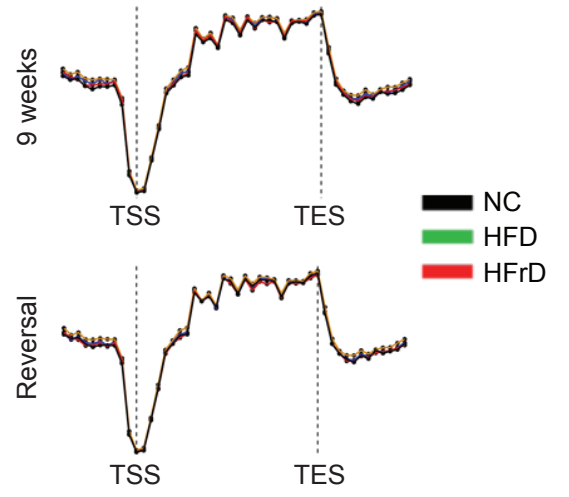

Supplement: 18_2019_3114_MOESM5_ESM.pdf [file 18_2019_3114_MOESM5_ESM.pdf]

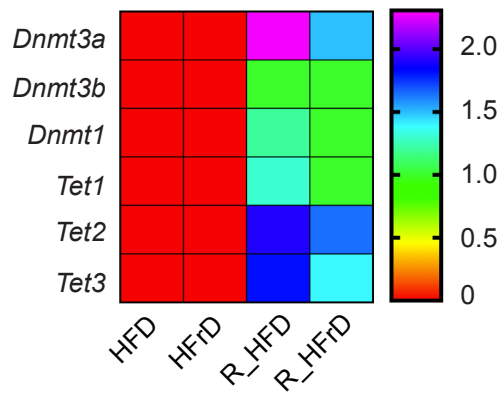

Supplement: 18_2019_3114_MOESM6_ESM.pdf [file 18_2019_3114_MOESM6_ESM.pdf]

Figure S7

A

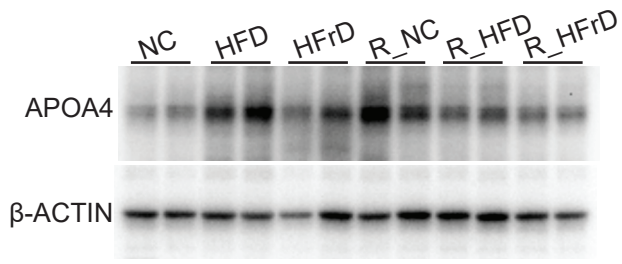

B

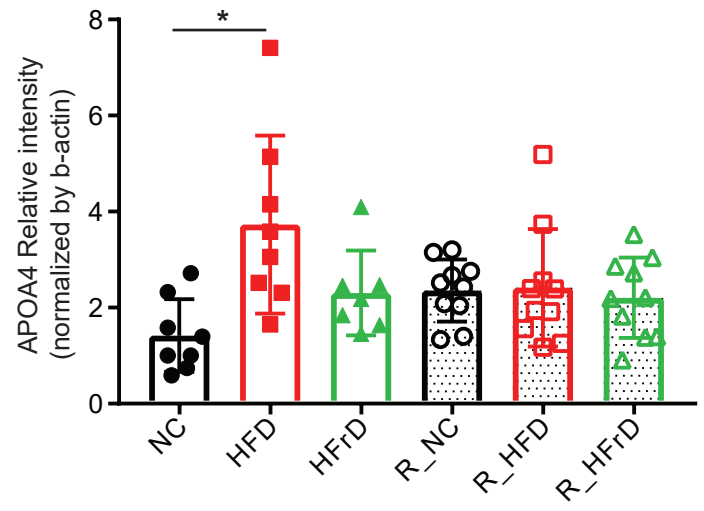

Supplement: 18_2019_3114_MOESM7_ESM.pdf [file 18_2019_3114_MOESM7_ESM.pdf]
